# Supplementary material for: HMGN5 promotes IL-6-induced epithelial-mesenchymal transition of bladder cancer by interacting with Hsp27
Source: publisher site journal article supplement (doi:10.18632/aging.103076), 2020-04-21
Supplement: Supplementary file [file aging-v12i8-103076-supplementary-material-SD1.pdf]

**SUPPLEMENTARY FIGURES**

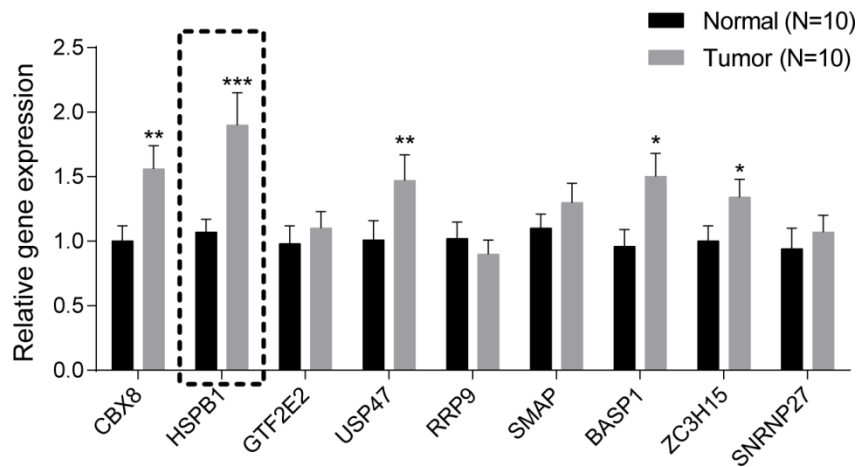

**Supplementary Figure 1.** The mRNA expression levels of the 9 genes (CBX8, HSPB1, GTF2E2, USP47, RRP9, SMAP, BASP1, ZC3H15, SNRNP27) in 10 bladder cancer tissues.

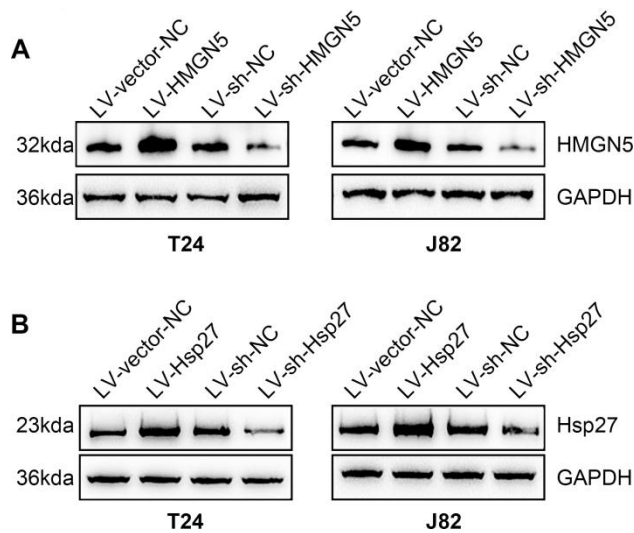

**Supplementary Figure 2.** The transduction efficiency of LV-HMGN5, LV-sh-HMGN5 (A), LV-Hsp27 and LV-sh-Hsp27 (B) in T24 and J82 cells as confirmed by immunoblotting analyses.
